# Supplementary material for: Is the COVID-19 Pandemic a Good Time to Include Aspergillus Molecular Detection to Categorize Aspergillosis in ICU Patients? A Monocentric Experience
Source: PubMed Central journal article supplement (PMC7558333; doi:10.3390/jof6030105), 2020-07-10
Supplement: jof-06-00105-s001.pdf [file jof-06-00105-s001.pdf]

**Table S1:** Clinical and biological features of the 9 patients classified as putative aspergillosis according to Blot et al., 2012.

| Patient | Age/Sex | Underlying condition                                          | ICU hospitalization duration (days) | Treatment             | Outcome at day 30 | <i>Aspergillus</i> positive culture (nb resp. samples) | Positive 28S PCR (nb resp. samples) | GM index > 0.5 (nb blood samples) | Positive 28S PCR (nb blood samples) | AspICU (Blot et al., 2012) | Modified AspICU |
|---------|---------|---------------------------------------------------------------|-------------------------------------|-----------------------|-------------------|--------------------------------------------------------|-------------------------------------|-----------------------------------|-------------------------------------|----------------------------|-----------------|
| 1       | 70/M    | Cardiomyopathy                                                | 34                                  | Isavuconazole 300mg/j | Alive             | 5                                                      | 5                                   | 2                                 | 2                                   | putative                   | probable        |
| 2       | 79/F    | Chronic myelo-monocytic leukemia;hypothyroidia                | 17                                  | Voriconazole 300mgx2  | Died              | 2                                                      | 2                                   | 1                                 | 1                                   | putative                   | probable        |
| 3       | 59/M    | Obesity;hypothyroidia; cardiomyopathy                         | 10                                  | Voriconazole 300mgx2  | Alive             | 0                                                      | 3                                   | 0                                 | 1                                   | no infection               | probable        |
| 4       | 78/M    | Hypertension                                                  | 25                                  | Voriconazole 300mgx2  | Died              | 4                                                      | 6                                   | 0                                 | 0                                   | putative                   | putative        |
| 5       | 75/M    | none                                                          | 21                                  | Voriconazole 200mgx2  | Alive             | 4                                                      | 4                                   | 0                                 | 0                                   | putative                   | putative        |
| 6       | 73/M    | none                                                          | 65                                  | Voriconazole 200mgx2  | Alive             | 2                                                      | 5                                   | 0                                 | 0                                   | putative                   | putative        |
| 7       | 49/F    | Lung transplantation in 2012;hypertension;renal insufficiency | 38                                  | Isavuconazole 200mg/j | Alive             | 1                                                      | 5                                   | 0                                 | 0                                   | putative                   | putative        |
| 8       | 71/M    | Obesity;hypertension                                          | 11                                  | Voriconazole 200mgx2  | Alive             | 1                                                      | 1                                   | 0                                 | 0                                   | putative                   | colonisation    |
| 9       | 46/F    | Obesity;hypothyroidia                                         | 9                                   | no treatment          | Alive             | 1                                                      | 0                                   | 1                                 | 0                                   | putative                   | colonisation    |
| 10      | 52/M    | Diabetes mellitus; hypothyroidia                              | 16                                  | no treatment          | Alive             | 0                                                      | 1                                   | 0                                 | 0                                   | putative                   | colonisation    |

Resp.: respiratory.
